# Supplementary material for: Postoperative Delirium and Cognitive Dysfunction after General and Regional Anesthesia: A Systematic Review and Meta-Analysis
Source: MDPI journal article supplement (doi:10.3390/jcm12103549), 2023-05-18
Supplement: s1 [file s1]

## Supplementary file

| Author, citation | Country   | Study design | Study goals                                                                                                                           | Age                                                          | N of patients: total (intervention / control)                                                                            | Group                                                                            | Surgery                                                                                              | General anesthesia | ASA status | Local anesthetics, volume and concentration, adjuvants                                                                                                                                                                                                                                                | Postoperative analgesia                                               |
|------------------|-----------|--------------|---------------------------------------------------------------------------------------------------------------------------------------|--------------------------------------------------------------|--------------------------------------------------------------------------------------------------------------------------|----------------------------------------------------------------------------------|------------------------------------------------------------------------------------------------------|--------------------|------------|-------------------------------------------------------------------------------------------------------------------------------------------------------------------------------------------------------------------------------------------------------------------------------------------------------|-----------------------------------------------------------------------|
| Zhang, 2019      | China     | RCT          | Primary – eye-opening time at 1, 3, 6, 24 hrs, MMSE, incidence of POCD at 24h, P300 wave                                              | ≥60<br>61-74<br>69.36<br>(2.57)                              | R, A: 80<br>(40/40)                                                                                                      | SA: Spinal anesthesia<br>GA: General anesthesia                                  | Orthopedic surgery                                                                                   | Yes in GA group    | NG         | SA: L3-4 epidural anesthesia + 1 ml of 0.5% + 0.25% lidocaine if necessary<br>GA: IV drip midazolam 0.05 mg/kg, propofol 1.5 mg/kg, fentanyl 0.4 µg/kg, and vecuronium bromide 0.1 mg/kg                                                                                                              | NG                                                                    |
| Tzimas, 2018     | Greece    | RCT          | Primary – POCD at 30 days and possible differences between groups<br>Secondary - delirium at 1 st, 2nd, 3rd and 4th postoperative day | >65<br>77.11<br>(6.5)<br>75.09<br>(6.08)                     | R: 72 (37/35)<br>A: 68 (35/33)                                                                                           | SA: Spinal anesthesia<br>GA: General anesthesia                                  | Hip fracture surgery                                                                                 | Yes in GA group    | I-III      | SA: L3-L4 or L3-C5 spinal puncture (Fentanyl 20 mcg and ropivacaine 0.75% administered in volume according to the somatometric characteristics of the patient)<br>GA: induction with fentanyl 3–5 µg.kg–1 and propofol 1.5 mg.kg–1; maintained with Desflurane by adjusting end-tidal concentrations. | Postoperative analgesia to keep VAS<44 mm                             |
| Silbert, 2014    | Australia | RCT          | Primary - incidence of POCD at 3 months.<br>Secondary - incidence of POCD at 7 days                                                   | ≥55<br>66.9<br>(56-81)<br>63.9<br>(55-78)<br>68.1<br>(60-75) | SA/GA<br>Rand: 98<br>(48/50)<br>Treat: 92<br>(42/50)<br>Anal at 7d:<br>87 (38/49)<br>Anal at 3mon:<br>85(41/44)<br>C: 26 | SA: Spinal analgesia<br>GA: General anesthesia<br>C: Non-treatment control group | SA, GA: Extracorporeal shock wave lithotripsy (ESWL) to break kidney stones<br>C: Hip osteoarthritis | Yes for GA group   | NG         | SA: T8 2 ml 0.5% heavy spinal bupivacaine, sedation avoided unless clinically indicated.<br>GA: IV midazolam ≤0.05 mg kg–1, fentanyl ≤1 µg kg–1, and propofol 1–2 mg kg–1<br>C: Analgesics for hip osteoarthritis                                                                                     | POA: Non-opioids (paracetamol, celecoxib) unless clinically indicated |
| Aleksik, 2006    | Germany   |              | Primary - changes in cognitive function and affective state                                                                           | 68 (8)<br>62 (11)                                            | 33/25                                                                                                                    | LCA: Local cervical anesthesia<br>LPA: Local peridural anesthesia                | LCA: Carotid endarterectomy<br>LPA: bypass revascularization for peripheral arterial occlusive       | No                 | NG         | LCA: Local cervical anesthesia<br>LPA: Local peridural anesthesia                                                                                                                                                                                                                                     | NG                                                                    |

## Supplementary file

|                          |                                          |                                        |                                                                                                                                                               |                                                           |                                                                                                  |                                                         |                                                                                      |                    |       |                                                                                                                                                                                                                                                                                                                                             |                                                                                                 |
|--------------------------|------------------------------------------|----------------------------------------|---------------------------------------------------------------------------------------------------------------------------------------------------------------|-----------------------------------------------------------|--------------------------------------------------------------------------------------------------|---------------------------------------------------------|--------------------------------------------------------------------------------------|--------------------|-------|---------------------------------------------------------------------------------------------------------------------------------------------------------------------------------------------------------------------------------------------------------------------------------------------------------------------------------------------|-------------------------------------------------------------------------------------------------|
|                          |                                          |                                        |                                                                                                                                                               |                                                           |                                                                                                  |                                                         | disease                                                                              |                    |       |                                                                                                                                                                                                                                                                                                                                             |                                                                                                 |
| Rasmussen, 2003          | Denmark<br>, data<br>from 7<br>countries | RCT                                    | Primary –<br>Incidence of<br>POCD                                                                                                                             | >60<br>71.1<br>(61.0-<br>83.7)<br>70.8<br>(61.3-<br>84.1) | R: 428<br>(211/217)<br><br>Completed 3<br>months: 340<br>(165/175)                               | RA: Regional<br>anesthesia<br>GA: General<br>anesthesia | Orthopedic,<br>gynecological,<br>urological,<br>gastrointestinal,<br>other surgeries | Yes in<br>GA group | I-IV  | RA: Spinal or epidural<br>anaesthesia. Sedation with<br>propofol permitted during<br>regional anaesthesia at a level<br>compatible with prompt<br>arousal to a verbal stimulus.<br>GA: Normocapnia<br>maintained. Neuraxial<br>blockade or regional<br>analgesia were not used.                                                             | RA: postoperative<br>epidural analgesia                                                         |
| Williams-<br>Russo, 1995 | USA                                      | RCT                                    | Primary -<br>memory,<br>psychomotor,<br>and language<br>skills<br>Secondary –<br>cardiovascular<br>outcomes                                                   | Median<br>69                                              | R: 262<br>(134/128)                                                                              | EA: Epidural<br>GA: General<br>anesthesia               | Elective primary<br>total knee<br>replacement                                        | Yes in<br>GA group | NG    | EA: L3-L4 or L2-L3 either<br>lidocaine 2% or bupivacaine<br>0.75% + midazolam and<br>fentanyl<br>GA: induction by thiopental<br>sodium, fentanyl,<br>vecuronium, maintained with<br>fentanyl and inhaled N2O<br>70%                                                                                                                         | EA: >95%<br>postoperative<br>epidural<br>anesthesia 12-72h<br>GA: IV analgesia<br>12-72h        |
| Campbell,<br>1993        | UK                                       | RCT                                    | Primary -<br>differential<br>changes in<br>cognitive<br>function<br>Secondary –<br>influence of<br>episodes of<br>hypotension or<br>hypoxia on the<br>outcome | >65<br>77.3<br>(7.71)<br>77.9<br>(7.22)                   | R: 169<br>(84/85)<br>A (pre, 24h, 2<br>weeks): 157<br>(80/77)<br>A (3<br>months): 120<br>(56/64) | LA: Local<br>anesthesia<br>GA: General<br>anesthesia    | Elective cataract<br>extraction                                                      | Yes in<br>GA group | NG    | LA:<br>Retrobulbar or peribulbar<br>blockade using lignocaine<br>(2%) with or without<br>bupivacaine (0.5%) + topical<br>amethocaine (1 %). Facial<br>nerve block for most patients.<br>GA: induction by thiopentone<br>(34<br>mg.kg-1) or methohexitone (1<br>mg.kg-1) and vecuronium<br>(0.1 mg.kg-1). Fentanyl<br>(0.05 mg) if required. | Paracetamol (1 g)                                                                               |
| Haan, 1991               | Netherla<br>nds                          | Prospective<br>partially<br>randomized | Primary - effect<br>on cognitive<br>functions and<br>whether<br>MMSE can<br>be used as a<br>tool to measure<br>and predict a<br>postoperative<br>decrease of  | Mean<br>71.8<br>(6.0),<br>range<br>63.3 –<br>86.5         | R + Non-R:<br>37 (22/15) +<br>12 (5/7)<br>Total 49<br>(27/22)                                    | S: Spinal<br>anesthesia<br>GA: General<br>anesthesia    | Elective<br>transurethral<br>prostatectomy<br>for benign<br>prostatic<br>hyperplasia | Yes in<br>GA group | I-III | Sedation for all patients<br>(temazepam 10 mg to 20 mg<br>(n = 45) or lorazepam 1<br>mg to 2 mg (n = 8)).<br>SA: 1% lidocaine + T8, T10<br>hyperbaric bupivacaine<br>0.5% (2 mL to 3 mL in 8%<br>dextrose)<br>GA: induction by thiopentone<br>(3 to 4 mg/kg body weight) or                                                                 | Symoron (1<br>mg/10 kg body<br>weight) every 6<br>hours<br>during 24 hours<br>post-operatively. |

# Supplementary file

|               |     |     |                                                                                    |                          |                                                                        |                                                                                   |                                                                                                     |                 |                        |                                                                                                                                                                                                                                                                                                                                                      |                                                  |
|---------------|-----|-----|------------------------------------------------------------------------------------|--------------------------|------------------------------------------------------------------------|-----------------------------------------------------------------------------------|-----------------------------------------------------------------------------------------------------|-----------------|------------------------|------------------------------------------------------------------------------------------------------------------------------------------------------------------------------------------------------------------------------------------------------------------------------------------------------------------------------------------------------|--------------------------------------------------|
|               |     |     | cognitive function                                                                 |                          |                                                                        |                                                                                   |                                                                                                     |                 |                        | etomidate (0.3 to 0.4 mg/kg body weight), maintained with nitrous oxide-oxygen mixture (fiO2: 0.33), fentanyl (0.1 mg) for added analgesia, pancuronium, and enflurane (0.6%)                                                                                                                                                                        |                                                  |
| Jones, 1990   | UK  | RCT | Primary - scores achieved in tests of cognitive function and functional competence | ≥60                      | R: 146 (72/74) + 50 Non-R controls<br>T: 146 (63/85)<br>A: 129 (65/64) | RA: Regional anesthesia<br>GA: General anesthesia                                 | Elective hip or knee replacement.                                                                   | Yes in GA group | NG                     | RA: IV midazolam (1 mg increments up to 10 mg). L2-3 or L3-4 2-3 ml of 0.5% bupivacaine in 8% dextrose. GA: induction by thiopentone, followed by pancuronium. Oxygen, nitrous oxide, and halothane supplemented by fentanyl (up to 0.2 mg).                                                                                                         | IM morphine, 10 mg every four hours as required. |
| Ghoneim, 1988 | USA | RCT | Primary - within-subject change in perceived and actual mental abilities           | 61.9 (1.8)<br>60.1 (2.3) | R, A: 105 (52/53)<br>Of 52: 38 subarachnoid, 14 epidural               | RA: Regional anesthesia: subarachnoid or epidural block<br>GA: General anesthesia | Total knee arthroplasty, total knee arthroplasty, vaginal hysterectomy, transurethral prostatectomy | Yes in GA group | 2.16 (0.1)<br>2 (0.09) | Subarachnoid: L3-L4 tetracaine (Pontocaine) in a hyperbaric dextrose 5%. Epidural: lumbar anesthesia 0.5% bupivacaine (Marcaine) with 1:200000 epinephrine. GA: induction with thiopental, maintained with nitrous oxide in oxygen and isoflurane (65%), enflurane (26%) or halothane (9%). Fentanyl and muscle relaxants occasionally administered. | According to usual routine                       |

## S1. Characteristics of included studies.

RCT-randomized controlled trial;

RA- regional anesthesia;

GA-general anesthesia;

VAS-visual analog scale;

NG-not given;



## Supplementary file

[illegible]

## Supplementary file

[illegible]



## Supplementary file

[illegible]



## Supplementary file

[illegible]

---

## Supplementary file

[illegible]

Supplementary file

|                                          |            |            |            |            |            |            |            |             |             |
|------------------------------------------|------------|------------|------------|------------|------------|------------|------------|-------------|-------------|
| Indirect comparisons                     | No          | No          |
| <b>Imprecision</b>                       | <b>No</b>  | <b>No</b>  | <b>Yes</b> | <b>No</b>  | <b>No</b>  | <b>No</b>  | <b>No</b>  | <b>Some</b> | <b>Some</b> |
| Few patients                             | No         | No         | Yes        | No         | No         | No         | No         | No          | No          |
| Wide confidence interval (CI)            | No         | No         | Yes        | No         | No         | No         | No         | Yes         | Yes         |
| <b>Positive</b>                          | <b>Yes</b>  | <b>Yes</b>  |
| RR>2 or<br>RR<0.5                        | Yes         | Yes         |
| RR>5 or<br>RR<0.2                        |            |            |            |            |            |            |            |             |             |
| Dose-response gradient                   | No          | No          |
| Effect of plausible residual confounding | No          | No          |

**S2. Addendum to the methodological assessment by GRADE.**

Patients: Patients undergoing any types of surgery; Intervention: Local anesthesia; Comparison: General anesthesia; Follow-up: In-hospital, 1 week, 3 months, 6 months

Supplementary file
